# Supplementary material
Source: PubMed Central journal article supplement (PMC3771816)
Supplement: jn.113.180794_nutrition180794SupplementaryData2.pdf [file jn.113.180794_nutrition180794SupplementaryData2.pdf]

## Online Supporting Material

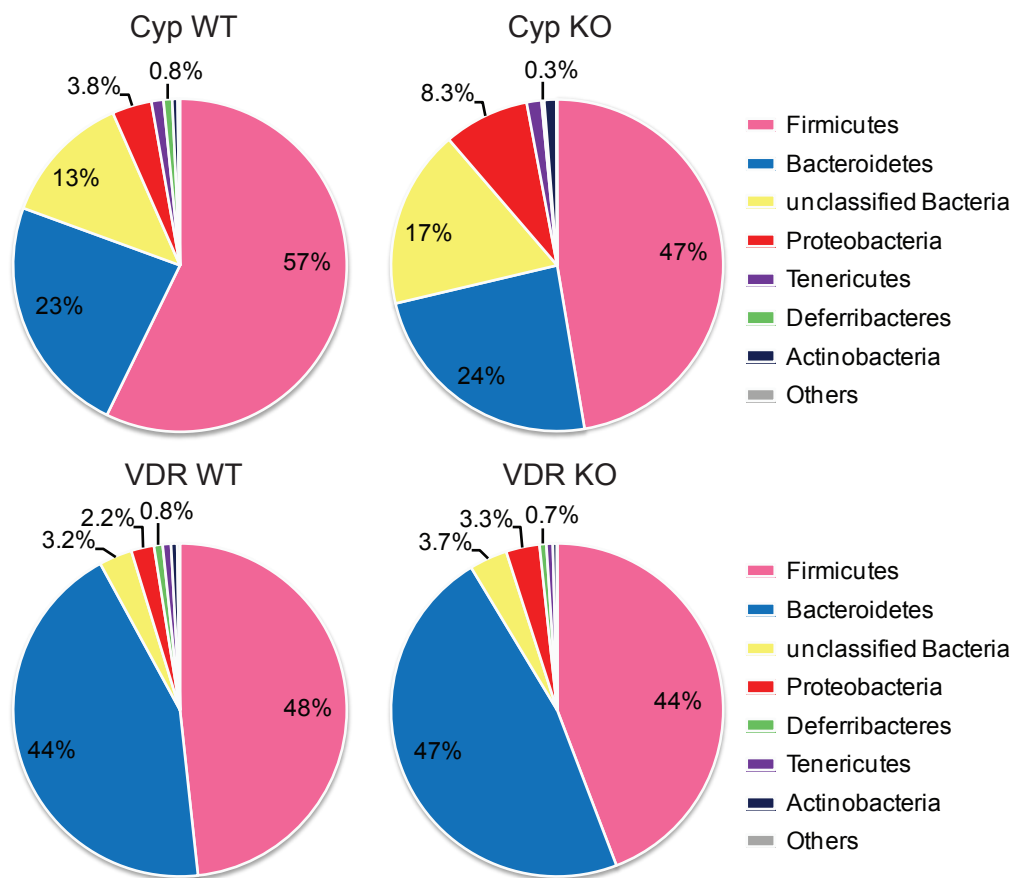

**Supplemental Figure 2. Metagenomic analysis of the frequencies of different bacterial phyla in the feces of Cyp WT, Cyp KO, VDR WT and VDR KO mice.** The phylogenetic frequencies of bacteria in the feces of Cyp KO and WT littermates (top) and VDR KO and WT littermates (bottom). Legends show the most common bacterial phyla found in the feces first and then in decreasing frequencies. n=4 males each for WT and Cyp KO and n=2 female each for WT and VDR KO. Cyp: *Cyp27b1*, KO: knockout, VDR: vitamin D receptor, WT: wild-type.
