# Supplementary material
Source: PubMed Central journal article supplement (PMC3771816)
Supplement: jn.113.180794_nutrition180794SupplementaryData3.pdf [file jn.113.180794_nutrition180794SupplementaryData3.pdf]

## Online Supporting Material

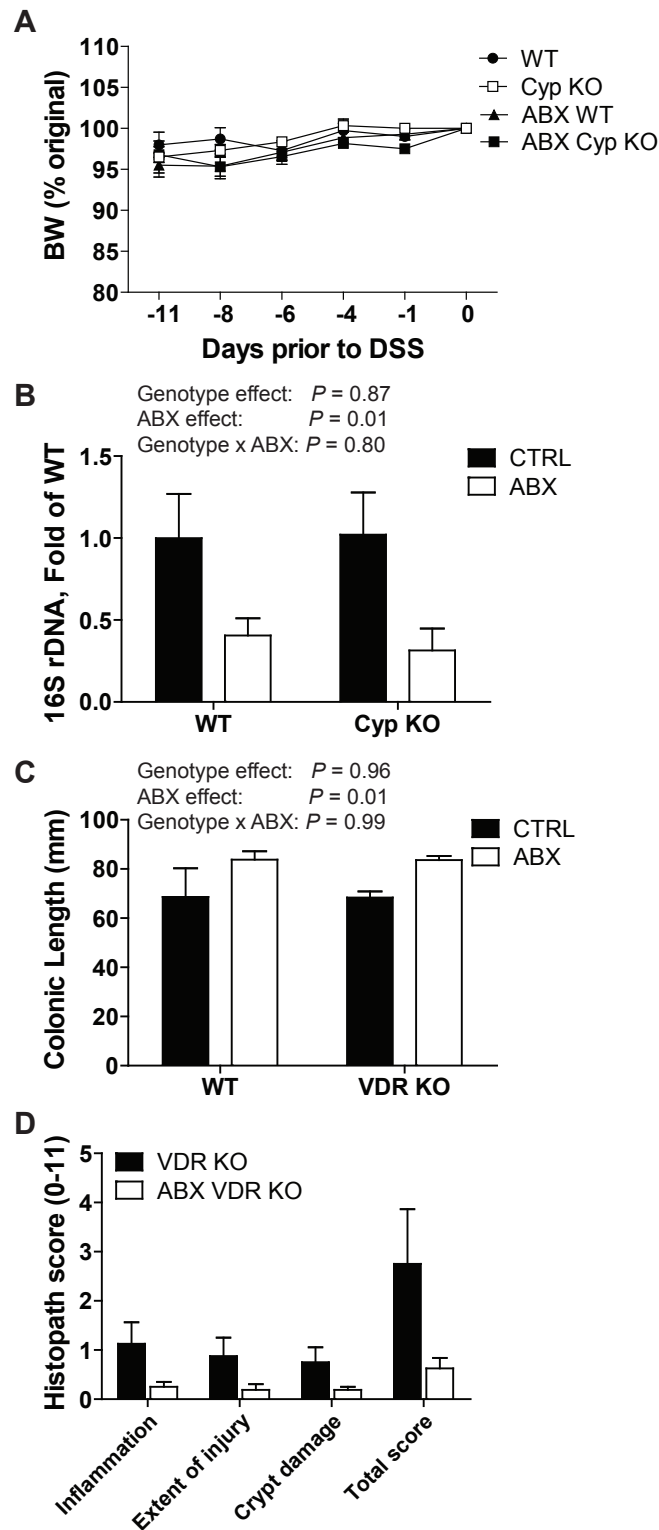

**Supplemental Figure 3. Symptoms of DSS-induced colitis in WT, Cyp KO, ABX WT and ABX Cyp KO mice.** (A) BW of WT, Cyp KO, ABX WT, ABX Cyp KO prior to DSS treatment. Values are mean  $\pm$  SEM,  $n=3-5$  mice per group. (B) Relative fold change of total 16S rDNA bacterial gene expression in feces before and after 2wk ABX. Values are mean  $\pm$  SEM,  $n=4$  mice per group. (C) Colonic lengths at d10 post-DSS in WT and Cyp KO littermates with and without ABX treatment. Values are mean  $\pm$  SEM,  $n=3-5$  mice per group. (D) Histological scores of the distal colon of VDR KO at d 10 post-DSS with and without ABX treatment. Values are mean  $\pm$  SEM,  $n=3-5$  mice per group. Data shown is one representative experiment of three independent experiments. ABX: antibiotics, ABX Cyp KO: antibiotics treated Cyp KO, ABX WT: antibiotics treated WT, BW: body weight, CTRL: control no antibiotics, Cyp: *Cyp27b1*, DSS: dextran sodium sulfate, VDR : vitamin D receptor, WT: wild-type.
