# Supplementary material
Source: PubMed Central journal article supplement (PMC3771816)
Supplement: jn.113.180794_nutrition180794SupplementaryData4.pdf [file jn.113.180794_nutrition180794SupplementaryData4.pdf]

## Online Supporting Material

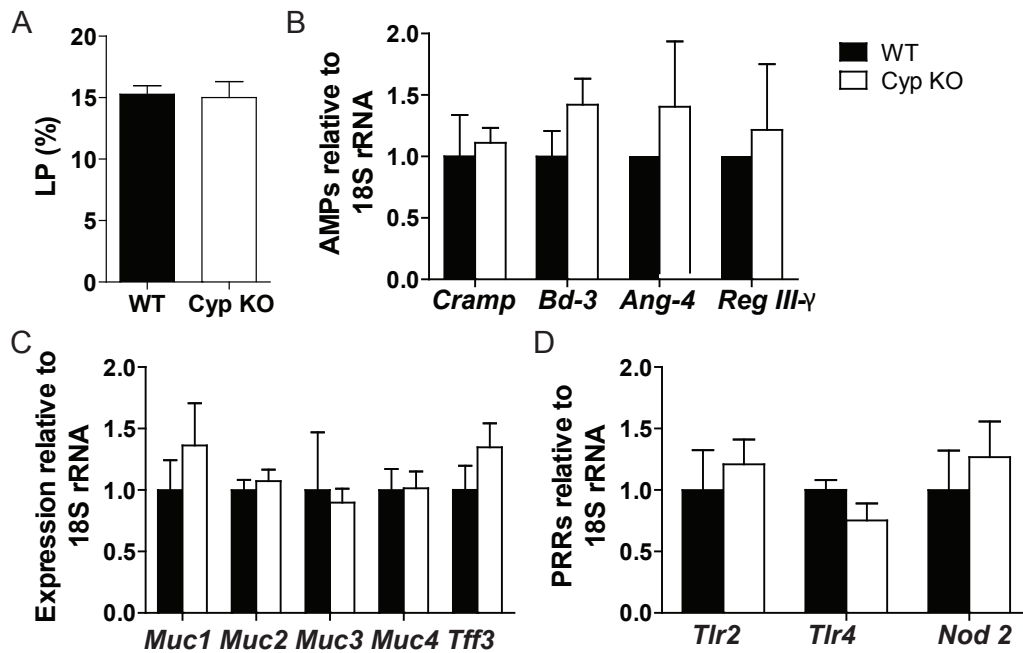

**Supplemental Figure 4. Expression of IgA, antibacterial mediators, and pattern recognition receptors in WT and Cyp KO mice.** (A) Frequency of IgA positive plasma cells (B220-IgA+) in the colon LP. Values are mean  $\pm$  SEM, n=3 mice per group. mRNA expression of (B) *Cramp*, *Bd-3*, *Ang-4*, *Reg III-γ*, (C) *Muc 1-4*, *Tff3*, (D) *Tlr2*, *Tlr4*, and *Nod2* receptors in the colon of Cyp WT and Cyp KO mice. Values are mean  $\pm$  SEM, n=4-7 mice per group. *Ang*: angiogenin, *Bd*:  $\beta$ -defensin, *Cramp*: cathelicidin-related antimicrobial peptide, Cyp: Cyp27B1, KO: knockout, LP: lamina propria, *Muc*: mucin, *Nod*: nucleotide-binding and ligomerization domain, *Tff*: trefoil family factor, *Tlr*: toll-like receptor, WT: wild-type.
