# Supplementary material
Source: PubMed Central journal article supplement (PMC3771816)
Supplement: jn.113.180794_nutrition180794SupplementaryData5.pdf [file jn.113.180794_nutrition180794SupplementaryData5.pdf]

## Supplementary Table 1

| Gene                             | Primer sequence                                                              |
|----------------------------------|------------------------------------------------------------------------------|
| <b>Bacterial quantification</b>  |                                                                              |
| 16S rDNA universal<br>(GC-clamp) | forward 5'-CGCCCGCCGCGCGCGGGCGGGCGGGGCGGGGGCA<br>CGGGGGGCCTACGGGAGGCAGCAG-3' |
| Helicobacteraceae                | reverse 5'-ATTACCGCGGCTGCTGG-3'<br>forward 5'-GGCTATGACGGGTATCCGGC-3'        |
| SFB                              | reverse 5'-GCCGTGCAGCACCTGTTTTTC-3'<br>forward 5'-GACGCTGAGGCATGAGAGCA-3'    |
|                                  | reverse 5'-GACGGCACGGATTGTTATTC-3'                                           |
| <b>Q-PCR</b>                     |                                                                              |
| CRAMP                            | forward 5'-CTTCAACCAGCAGTCCCTAGACA-3'                                        |
|                                  | reverse 5'-TCCAGGTCCAGGAGACGGTA-3'                                           |
| $\beta$ -defensin 3              | forward 5'-GCTAGGGAGCACTTGTTC-3'                                             |
|                                  | reverse 5'-TTGTTTGAGGAAAGGAGGCA-3'                                           |
| Angiogenin-4                     | forward 5'-CTCTGGCTCAGAATGAAAGGTACGA-3'                                      |
|                                  | reverse 5'-GAAATCTTTAAAGGCTCGGTACCC-3'                                       |
| RegIII- $\gamma$                 | forward 5'-TTCCTGTCCTCCATGATCAAAA-3'                                         |
|                                  | reverse 5'-CATCCACCTCTGTTGGGTTCA-3'                                          |
| mucin 1                          | forward 5'-TGCCAGTGCCGCCGAAAGAG-3'                                           |
|                                  | reverse 5'-GCCGAAACCTCCTCATAGGGGC-3'                                         |
| mucin 2                          | forward 5'-GCTGACGAGTGGTTGGTGAATG-3'                                         |
|                                  | reverse 5'-GATGAGGTGGCAGACAGGAGAC-3'                                         |
| mucin 3                          | forward 5'-CGTGGTCAACTGCGAGAATGG-3'                                          |
|                                  | reverse 5'-CGGCTCTATCTCTACGCTCTCC-3'                                         |
| mucin 4                          | forward 5'-CAGCAGCCAGTGGGGACAG-3'                                            |
|                                  | reverse 5'-CTCAGACACAGCCAGGGAAGTCC-3'                                        |
| TFF3                             | forward 5'-CCTGGTTGCTGGGTCCTCTG-3'                                           |
|                                  | reverse 5'-GCCACGGTTGTTACACTGCTC-3'                                          |
| TLR2                             | forward 5'-TCTGGGCAGTCTTGAACATTT-3'                                          |
|                                  | reverse 5'-AGAGTCAGGTGATGGATGTGC-3'                                          |
| TLR4                             | forward 5'-GCAATGTCTCTGGCAGGTGTA-3'                                          |
|                                  | reverse 5'-CAAGGGATAAGAACGCTGAGA-3'                                          |
| NOD2                             | forward 5'-CAACATCTCCCACAGAGTTGTAATCC-3'                                     |
|                                  | reverse 5'-GGCACCTGAAGTTGACATTTTGC-3'                                        |
| 18S rRNA                         | forward 5'-CATTCGAACGTCTGCCCTATC-3'                                          |
|                                  | reverse 5'-CCTGCTGCCTTCCTTGGA-3'                                             |
